# Supplementary material for: Pego do Diabo (Loures, Portugal): Dating the Emergence of Anatomical Modernity in Westernmost Eurasia
Source: PLOS journal article supplement (doi:10.1371/journal.pone.0008880), 2010-01-26
Supplement: S7 (10.1371/journal.pone.0008880.s007) [file journal.pone.0008880.s007]

Table S7 – Taphonomically reliable <sup>14</sup>C and TL results for the Middle-to-Upper Paleolithic transition in Iberia (a).

| Site                       | Layer                            | Composition                           | Method              | Lab #          | Age<br>[ <sup>14</sup> C years BP] | cal BP age    |
|----------------------------|----------------------------------|---------------------------------------|---------------------|----------------|------------------------------------|---------------|
| LATEST MIDDLE PALEOLITHIC  |                                  |                                       |                     |                |                                    |               |
| Sima de las Palomas        | 2e                               | Burnt bone                            | AMS <sup>14</sup> C | OxA-10666      | 34,450±600                         | 41,650-37,730 |
|                            | 2l                               | Burnt rabbit bone                     | AMS <sup>14</sup> C | OxA-15423      | 35,030±270                         | 41,880-38,400 |
| Cueva Antón (b)            | I-k                              | <i>Pinus nigra</i> charcoal           | AMS <sup>14</sup> C | OxA-21244      | 32,890±200                         | 38,670-35,750 |
| Jarama VI                  | 2.2                              | Charcoal                              | AMS <sup>14</sup> C | Beta-56639     | 32,600±1800                        | 42,080-33,040 |
|                            | 2.1                              | Charcoal                              | AMS <sup>14</sup> C | Beta-56638     | 29,500±2700                        | 40,200-28,720 |
| Gorham's Cave              | Trench 7 m inside from main area | <i>Pinus</i> sp. charcoal             | AMS <sup>14</sup> C | OxA-10295      | 34,600±900                         | 42,010-37,170 |
|                            | IV from back of the cave         | <i>Pinus</i> sp. charcoal, cone scale | AMS <sup>14</sup> C | OxA-10230      | 32,330±390                         | 38,590-34,950 |
|                            | Context 24                       | Charcoal                              | AMS <sup>14</sup> C | OxA-7857       | 32,280±420                         | 38,580-34,860 |
| Gruta da Oliveira          | 8                                | Burnt bone                            | AMS <sup>14</sup> C | GrA-10200      | 31,900±200                         | 36,320-35,200 |
|                            |                                  | Burnt bone                            | AMS <sup>14</sup> C | OxA-8671       | 32,740±420                         | 38,760-35,440 |
| EARLIEST UPPER PALEOLITHIC |                                  |                                       |                     |                |                                    |               |
| Cueva Bajondillo (c)       | 11                               | Sediments & charcoal                  | AMS <sup>14</sup> C | Ua-17150       | 33,690±1195                        | 42,210-34,770 |
|                            |                                  | Sediments & charcoal                  | AMS <sup>14</sup> C | Ua-18050       | 32,770±1065                        | 40,520-34,400 |
| Gato Preto (d)             | C                                | Burnt flint                           | TL                  | British Museum | –                                  | 45,900-30,300 |
| Cueva de Mallaetes (e)     | XII                              | Charcoal                              | <sup>14</sup> C     | KN-I/926       | 29,690±560                         | 34,890-32,930 |
| Gorham's Cave (f)          | Context 9                        | <i>Pinus</i> sp. charcoal             | AMS <sup>14</sup> C | OxA-7076       | 30,250±700                         | 35,700-33,220 |
|                            |                                  | <i>Pinus</i> sp. charcoal             | AMS <sup>14</sup> C | OxA-7074       | 30,200±700                         | 35,650-33,170 |
|                            |                                  | <i>Pinus</i> sp. charcoal             | AMS <sup>14</sup> C | OxA-7075       | 29,800±700                         | 35,210-32,770 |
|                            |                                  | <i>Pinus</i> sp. charcoal             | AMS <sup>14</sup> C | OxA-7077       | 29,250±650                         | 34,730-32,370 |
|                            | Context 11                       | Burnt bone                            | AMS <sup>14</sup> C | OxA-7388       | 29,100±340                         | 34,320-32,760 |
|                            | Context 13a                      | <i>Pinus</i> sp. charcoal             | AMS <sup>14</sup> C | OxA-7110       | 29,250±750                         | 34,850-32,210 |
|                            | Context 15                       | Charcoal                              | AMS <sup>14</sup> C | OxA-7792       | 28,680±240                         | 33,860-32,460 |
|                            | Layer D (Waechter's excavation)  | Charcoal                              | <sup>14</sup> C     | GrN-1455       | 28,700±200                         | 33,830-32,550 |
|                            |                                  | Charcoal                              | <sup>14</sup> C     | GrN-1363       | 27,860±300                         | 33,020-31,780 |

(a) After [19, 50, 107]. Calibration used CalPal with the CalPal\_2007\_HULU calibration curve [33-34], and cal BP results are the 95.4 % probability age ranges.

(b) ABOx-SC method. Two samples from this level treated with the normal ABA method yielded a younger result (~31.1 ka <sup>14</sup>C BP in both cases), indicating that residual contaminants could not have been removed by standard pre-treatment techniques, a problem that may explain <32 ka <sup>14</sup>C BP charcoal results for other sites of the Iberian Middle Paleolithic.

(c) Because the site is a rock shelter excavated in Middle-Upper Pleistocene travertines, the inclusion of sediment in these samples may have contaminated them with unknown amounts of old carbon; therefore, they should be treated as maximum ages only.

(d) Probability interval calculated from the average (38100±3900 BP) of the results obtained for samples GPR4 and GPR11.

(e) The lithics are not diagnostic, but a bone point from this layer is typical of the later Aurignacian (II or III-IV).

(f) The lack of index fossils precludes assignation of the diagnostically Upper Paleolithic stone tool assemblages recovered from these Gorham's Cave contexts to either the Aurignacian II or the Aurignacian III-IV, but the dating places them firmly within the range of the later Aurignacian and excludes other blade-based technocomplexes of the Iberian Upper Paleolithic (Gravettian and Solutrean).
